# Supplementary material for: Bayesian Networks Illustrate Genomic and Residual Trait Connections in Maize (Zea mays L.)
Source: PubMed Central journal article supplement (PMC5555481; doi:10.1534/g3.117.044263), 2017-06-21
Supplement: 2779FigureS1.pdf [file 2779FigureS1.pdf]

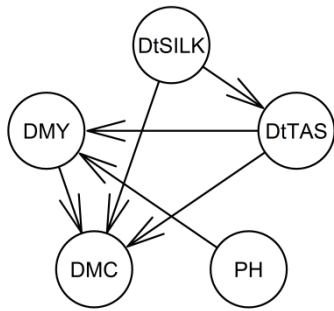

$$\Lambda = \begin{pmatrix} 0 & 0 & 0 & 0 & 0 \\ 0 & 0 & 0 & 0 & 0 \\ \lambda_{DtTAS, DtSILK} & 0 & 0 & 0 & 0 \\ 0 & \lambda_{DMY, PH} & \lambda_{DMY, DtTAS} & 0 & 0 \\ \lambda_{DMC, DtSILK} & 0 & \lambda_{DMC, DtTAS} & \lambda_{DMC, DMY} & 0 \end{pmatrix}$$

coefficients ordered as:  
DtSILK – PH – DtTAS – DMY – DMC

Figure S1. Transformation from a DAG to a structure matrix  $\Lambda$ . An example of a directed, acyclic graph and its respective structure matrix is shown. The structure was learned by a Bayesian network algorithm.
