# Supplementary material for: Bayesian Networks Illustrate Genomic and Residual Trait Connections in Maize (Zea mays L.)
Source: PubMed Central journal article supplement (PMC5555481; doi:10.1534/g3.117.044263), 2017-06-21
Supplement: 2779TableS2.pdf [file 2779TableS2.pdf]

Table S2. Double-structure evaluation: Predictive abilities<sup>1</sup> with standard deviation for the multiple-trait model (MTM) and for structural equation models (SEM) including both genomic ( $\Lambda_{\bar{G}}$ ) and residual ( $\Lambda_{\bar{E}}$ ) trait structure denoted by the Bayesian network (BN) algorithms they originate from.

| BN giving $\Lambda_{\bar{E}}$ | BN giving $\Lambda_{\bar{G}}$ | DMY <sup>2</sup> | DMC         | PH          | DtTAS       | DtSILK      |
|-------------------------------|-------------------------------|------------------|-------------|-------------|-------------|-------------|
| Dent                          |                               |                  |             |             |             |             |
| TABU 1                        | GS 3                          | 0.53 (0.05)      | 0.64 (0.04) | 0.69 (0.04) | 0.63 (0.05) | 0.68 (0.04) |
| TABU 2                        | GS 3                          | 0.53 (0.05)      | 0.64 (0.04) | 0.69 (0.04) | 0.63 (0.05) | 0.68 (0.04) |
| TABU 1                        | GS 1, 2, 4                    | 0.53 (0.05)      | 0.64 (0.04) | 0.69 (0.04) | 0.63 (0.05) | 0.68 (0.04) |
| TABU 1                        | TABU 1, 2                     | 0.53 (0.05)      | 0.64 (0.04) | 0.69 (0.04) | 0.63 (0.05) | 0.68 (0.04) |
| TABU 2                        | TABU 1, 2                     | 0.53 (0.05)      | 0.64 (0.04) | 0.69 (0.04) | 0.63 (0.05) | 0.68 (0.04) |
| TABU 2                        | GS 1, 2, 4                    | 0.53 (0.05)      | 0.64 (0.04) | 0.69 (0.04) | 0.62 (0.05) | 0.68 (0.04) |
| -----                         | -----                         | 0.52 (0.05)      | 0.64 (0.04) | 0.69 (0.04) | 0.62 (0.04) | 0.68 (0.04) |
| GS 1, 2, 3, 4                 | GS 3                          | 0.53 (0.05)      | 0.63 (0.04) | 0.69 (0.04) | 0.62 (0.04) | 0.67 (0.04) |
| GS 1, 2, 3, 4                 | GS 1, 2, 4                    | 0.53 (0.05)      | 0.63 (0.04) | 0.69 (0.04) | 0.62 (0.04) | 0.67 (0.04) |
| GS 1, 2, 3, 4                 | TABU1, 2                      | 0.53 (0.05)      | 0.63 (0.04) | 0.69 (0.04) | 0.62 (0.04) | 0.67 (0.04) |
| Flint                         |                               |                  |             |             |             |             |
| -----                         | -----                         | 0.64 (0.04)      | 0.67 (0.05) | 0.70 (0.04) | 0.74 (0.04) | 0.76 (0.04) |
| TABU 1, 2                     | TABU 1                        | 0.63 (0.04)      | 0.67 (0.05) | 0.70 (0.04) | 0.74 (0.03) | 0.76 (0.03) |
| TABU 1, 2                     | GS 1, 2, 3, 4                 | 0.63 (0.04)      | 0.67 (0.05) | 0.70 (0.04) | 0.74 (0.03) | 0.76 (0.03) |
| TABU 1, 2                     | TABU 2                        | 0.63 (0.04)      | 0.67 (0.05) | 0.70 (0.05) | 0.74 (0.04) | 0.76 (0.04) |
| GS 1, 2, 3, 4                 | TABU 2                        | 0.64 (0.04)      | 0.67 (0.05) | 0.68 (0.04) | 0.73 (0.03) | 0.75 (0.03) |
| GS 1, 2, 3, 4                 | TABU 1                        | 0.64 (0.04)      | 0.67 (0.05) | 0.68 (0.05) | 0.73 (0.04) | 0.75 (0.04) |
| GS 1, 2, 3, 4                 | GS 1, 2, 3, 4                 | 0.64 (0.04)      | 0.67 (0.05) | 0.68 (0.05) | 0.73 (0.04) | 0.75 (0.04) |

For notation of BN algorithms see material and methods, “Learning genomic and residual Bayesian networks”.

<sup>1</sup> Average of 10 random 5-fold cross-validations

<sup>2</sup> Traits: DMY biomass dry matter yield (dt/ha), DMC biomass dry matter content (%), PH plant height (cm), DtTAS days to tasseling (days), DtSILK days to silking (days)
